# Supplementary material
Source: MDPI journal article supplement (https://www.mdpi.com/2073-4395/12/8/1883)
Supplement: s1 [file s1]

## Supplementary Materials

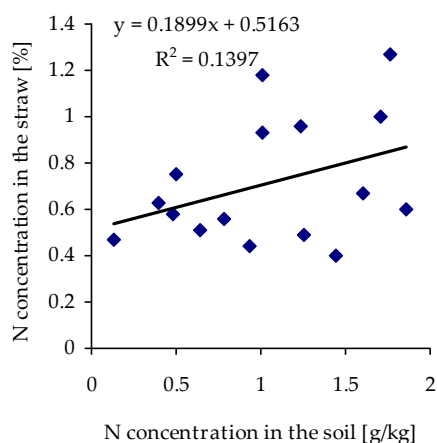

(a)

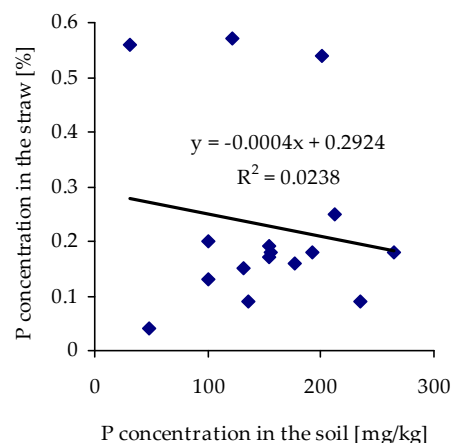

(b)

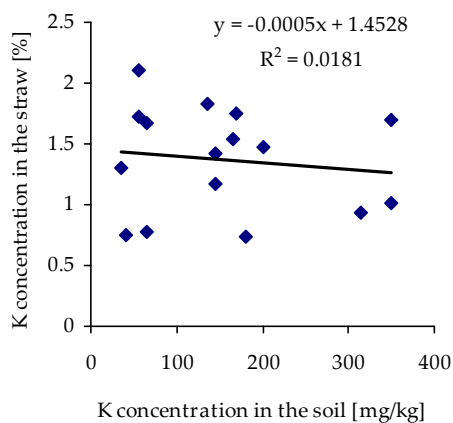

(c)

**Figure S1.** Relationship between: **(a)** the concentration of N in the straw [% dry matter] and N concentration in the soil ( $p < 0.05$ ;  $r = 0.37$ ); **(b)** the concentration of P in the straw [% DM] and P concentration in the soil ( $p < 0.05$ ;  $r = -0.15$ ), and **(c)** the concentration of K in the straw [% DM] and K concentration in the soil ( $p < 0.05$ ;  $r = -0.13$ ).

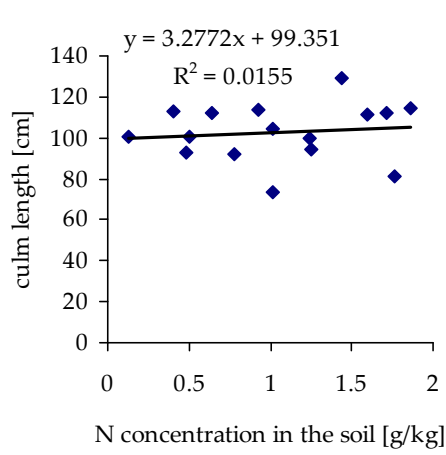

(a)

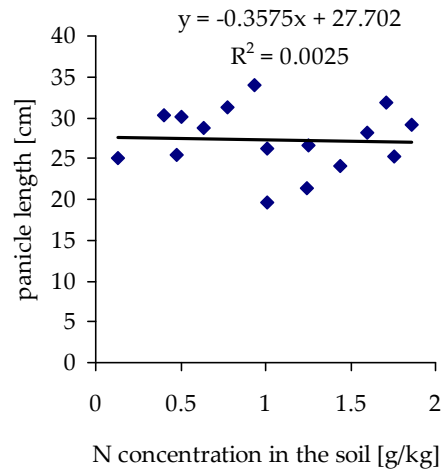

(b)

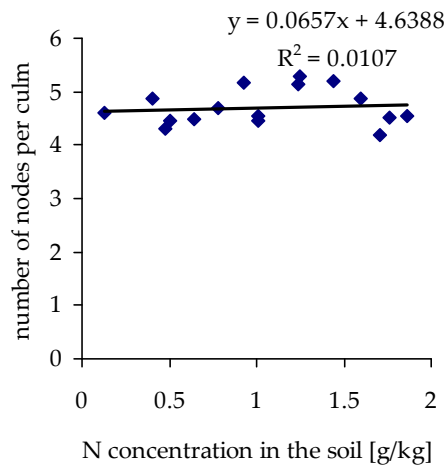

(c)

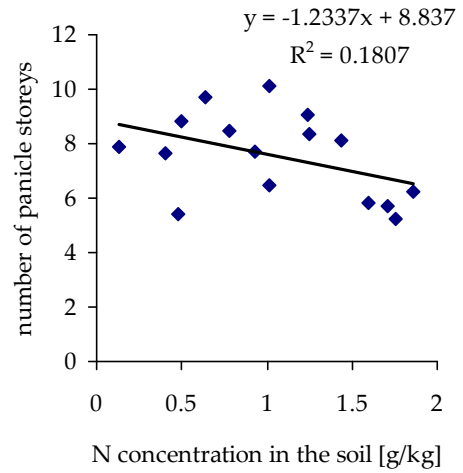

(d)

**Figure S2.** Relationship between the N concentration in the soil and selected morphological features of *A. spica-venti*: **(a)** culm length ( $p < 0.05$ ;  $r = 0.12$ ), **(b)** panicle length ( $p < 0.05$ ;  $r = -0.05$ ), **(c)** number of nodes per culm ( $p < 0.05$ ;  $r = 0.10$ ), and **(d)** number of panicle storeys ( $p < 0.05$ ;  $r = -0.43$ ).

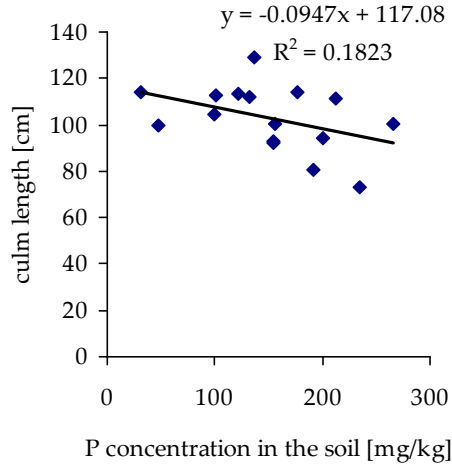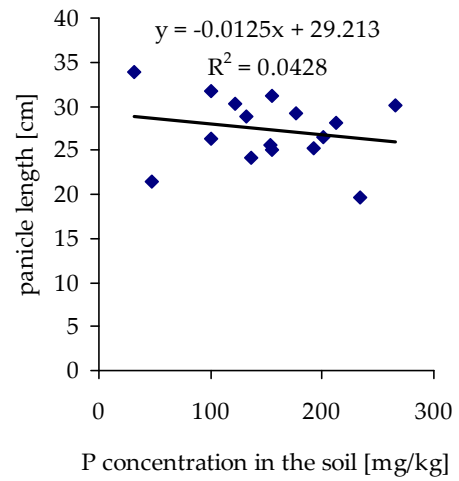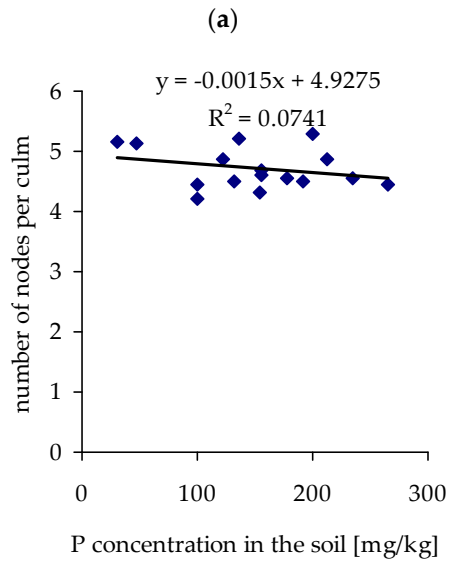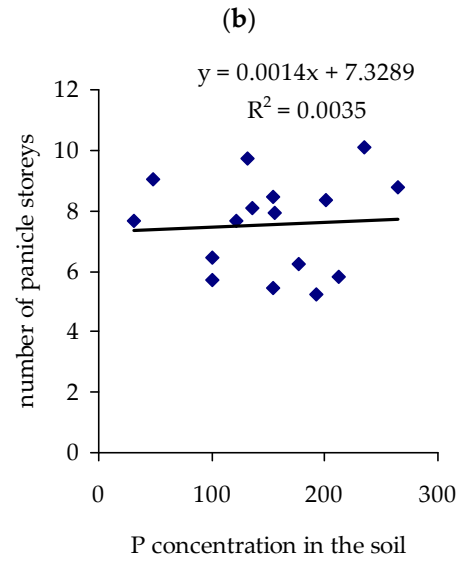

(c)

(d)

**Figure S.3** Relationship between the P concentration in the soil and selected morphological features of *A. spica-venti*: **(a)** culm length ( $p < 0.05$ ;  $r = -0.43$ ), **(b)** panicle length ( $p < 0.05$ ;  $r = -0.21$ ), **(c)** number of nodes per culm ( $p < 0.05$ ;  $r = -0.27$ ), and **(d)** number of panicle storeys ( $p < 0.05$ ;  $r = 0.06$ ).

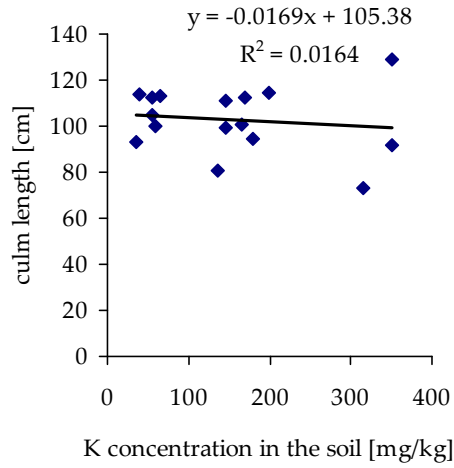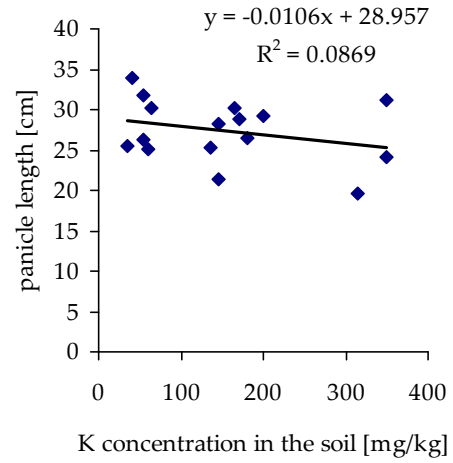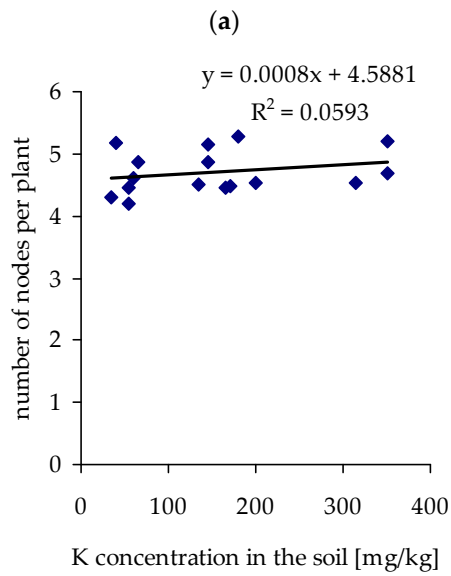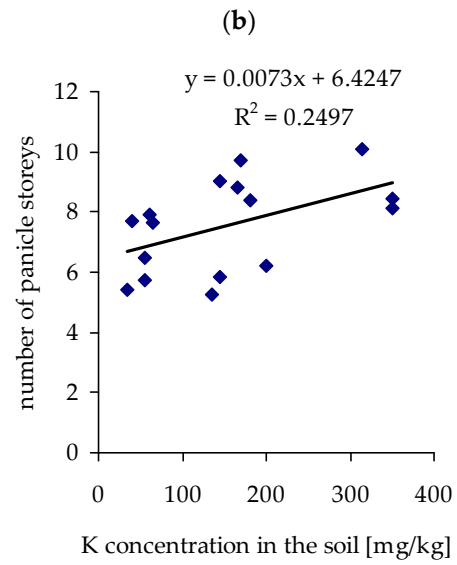

(c)

(d)

**Figure S4** Relationship between the K concentration in the soil and selected morphological features of *A. spica-venti*: **(a)** culm length ( $p < 0.05$ ;  $r = -0.13$ ), **(b)** panicle length ( $p < 0.05$ ;  $r = -0.29$ ), **(c)** number of nodes per culm ( $p < 0.05$ ;  $r = 0.24$ ), and **(d)** number of panicle storeys ( $p < 0.05$ ;  $r = 0.50$ ).

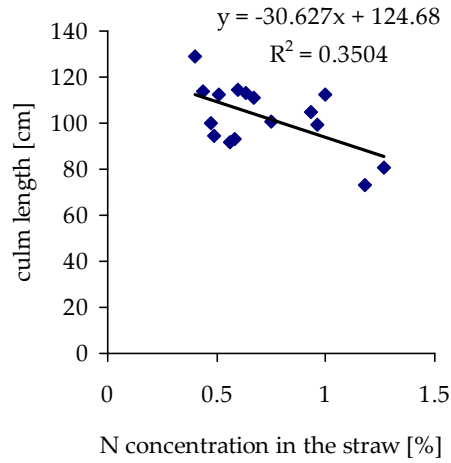

(a)

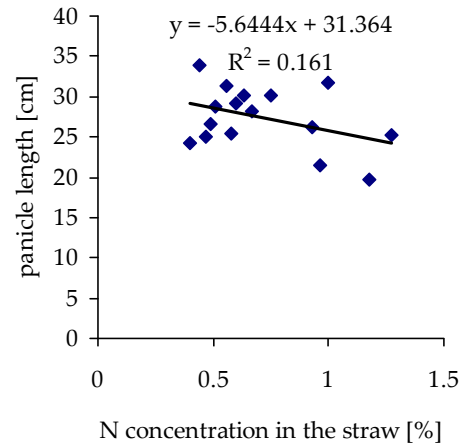

(b)

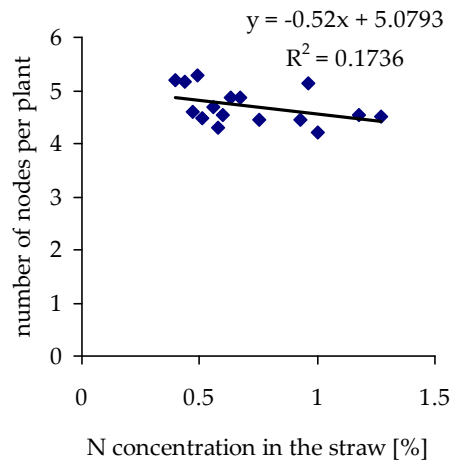

(c)

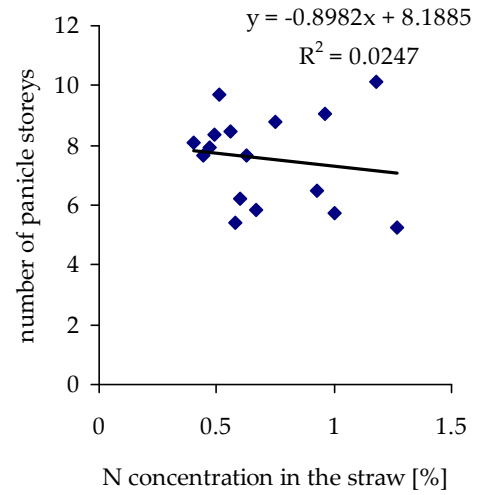

(d)

**Figure S5.** Relationship between the N concentration in the straw [% dry matter] and selected morphological features of *A. spica-venti*: **(a)** culm length ( $p < 0.05$ ;  $r = -0.59$ ), **(b)** panicle length ( $p < 0.05$ ;  $r = -0.40$ ), **(c)** number of nodes per culm ( $p < 0.05$ ;  $r = -0.42$ ), and **(d)** number of panicle storeys ( $p < 0.05$ ;  $r = -0.16$ ).

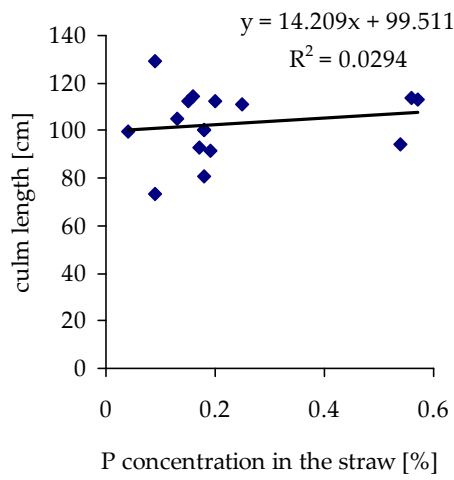

(a)

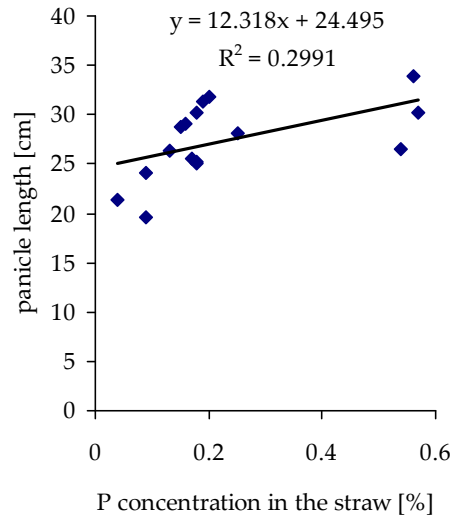

(b)

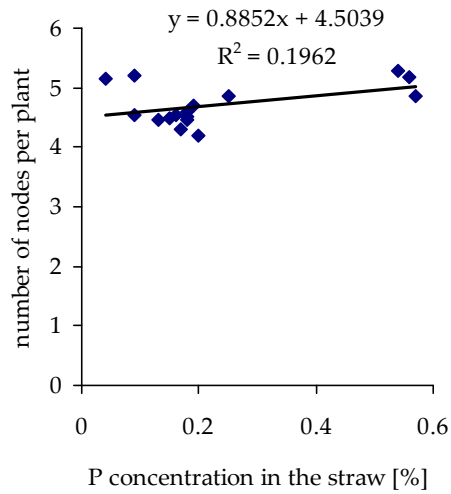

(c)

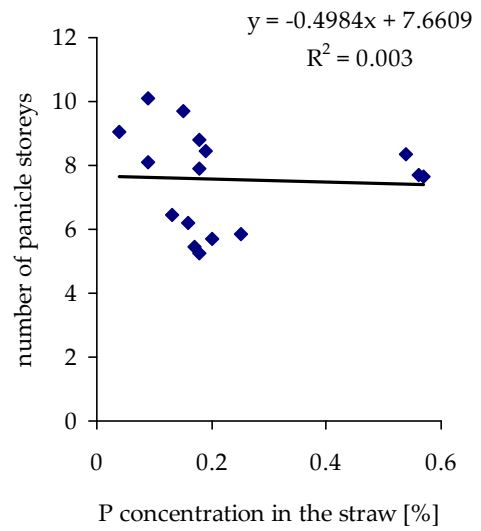

(d)

**Figure S6.** Relationship between the P concentration in the straw [% dry matter] and selected morphological features of *A. spica-venti*: **(a)** culm length ( $p < 0.05$ ;  $r = 0.17$ ), **(b)** panicle length ( $p < 0.05$ ;  $r = 0.55$ ), **(c)** number of nodes per culm ( $p < 0.05$ ;  $r = 0.44$ ), and **(d)** number of panicle storeys ( $p < 0.05$ ;  $r = -0.05$ ).

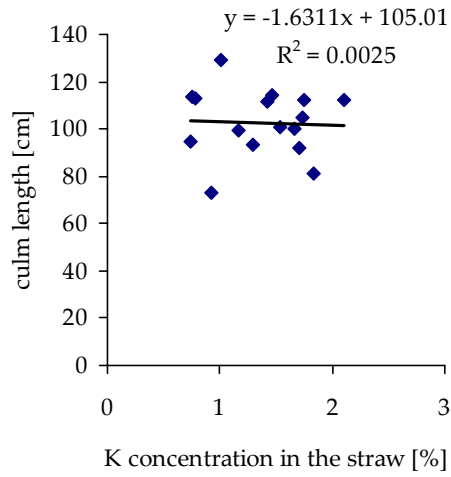

(a)

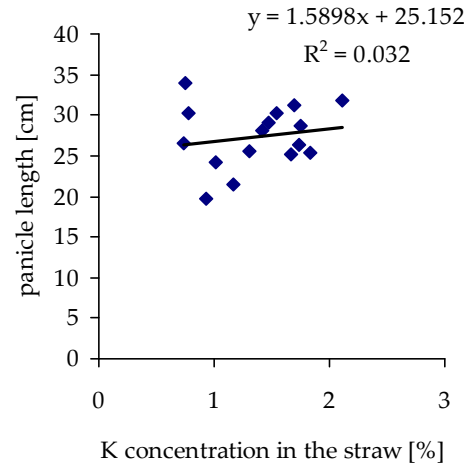

(b)

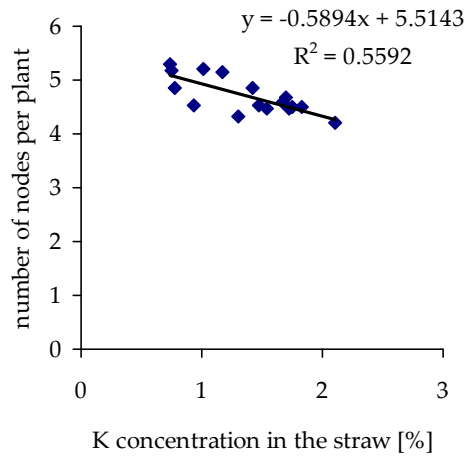

(c)

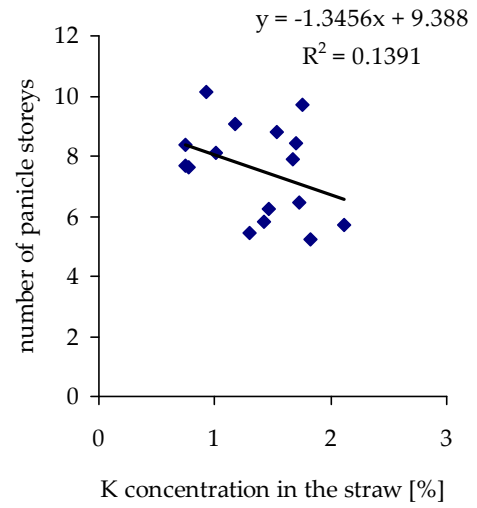

(d)

**Figure S7.** Relationship between the K concentration in the straw [% dry matter] and selected morphological features of *A. spica-venti*: **(a)** culm length ( $p < 0.05$ ;  $r = -0.05$ ), **(b)** panicle length ( $p < 0.05$ ;  $r = 0.18$ ), **(c)** number of nodes per culm ( $p < 0.05$ ;  $r = -0.75$ ), and **(d)** number of panicle storeys ( $p < 0.05$ ;  $r = -0.37$ ).

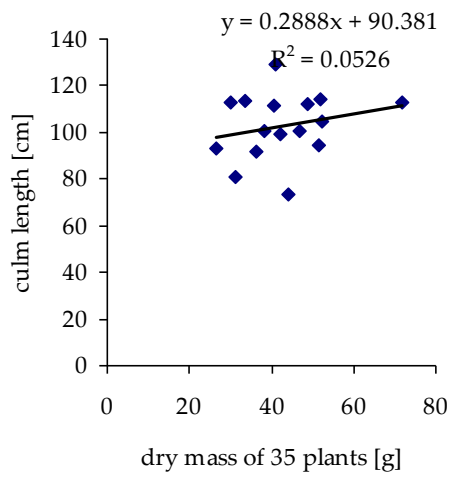

(a)

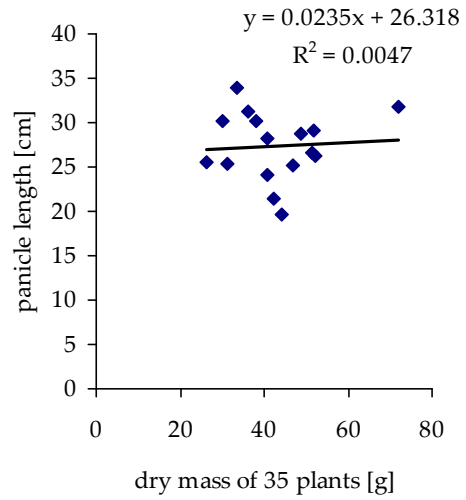

(b)

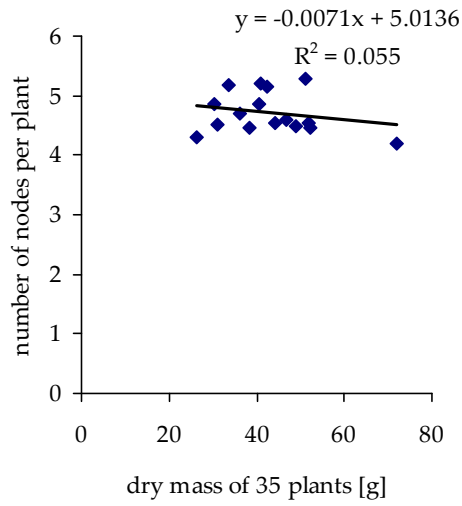

(c)

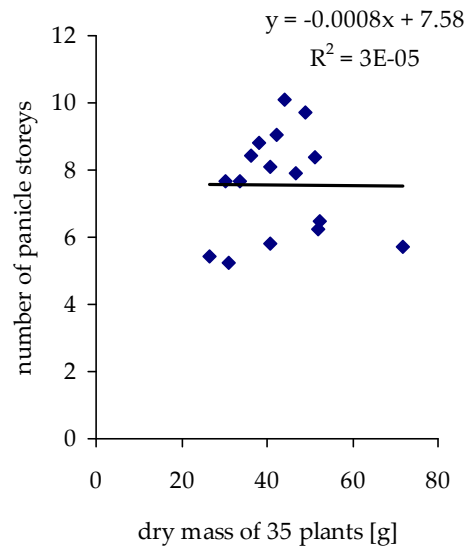

(d)

**Figure S8.** Relationship between the dry mass of 35 plants of *A. spica-venti* and selected morphological features of *A. spica-venti*: (a) culm length ( $p < 0.05$ ;  $r = 0.23$ ), (b) panicle length ( $p < 0.05$ ;  $r = 0.07$ ), (c) number of nodes per culm ( $p < 0.05$ ;  $r = -0.23$ ), and (d) number of panicle storeys ( $p < 0.05$ ;  $r = -0.01$ ).



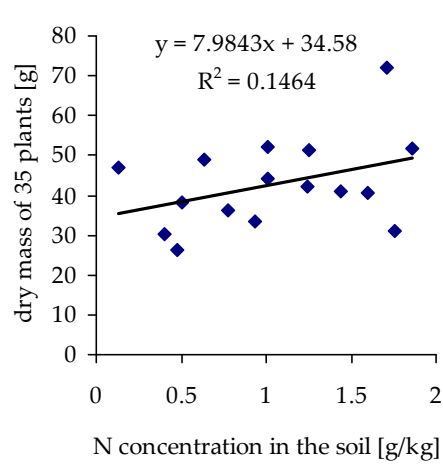

(a)

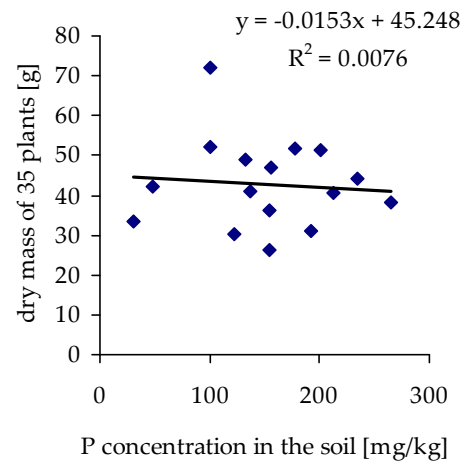

(b)

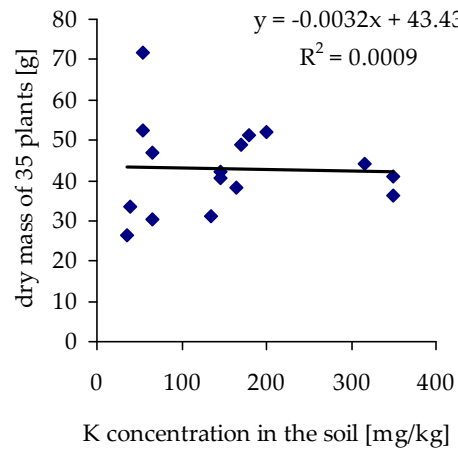

(c)

**Figure S9.** Relationship between the dry mass of 35 plants of *A. spica-venti* and the concentration of N, P, K in the soil: **(a)** N ( $p < 0.05$ ;  $r = 0.38$ ); **(b)** P ( $p < 0.05$ ;  $r = -0.08$ ), and **(c)** K ( $p < 0.05$ ;  $r = -0.03$ ).

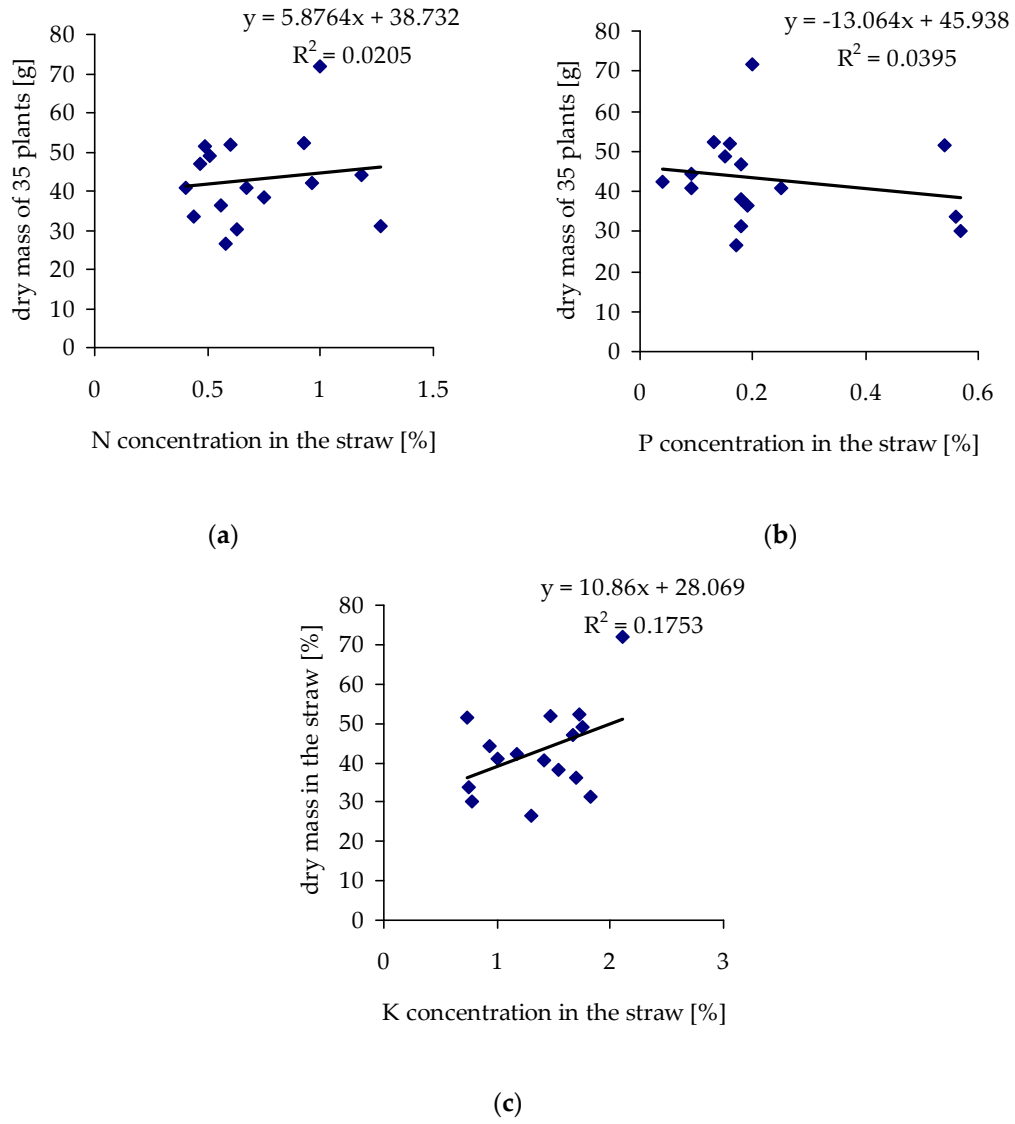

**Figure S10.** Relationship between the dry mass of 35 plants of *A. spica-venti* and the concentration of N, P, K in the straw [% dry matter]: **(a)** N ( $p < 0.05$ ;  $r = 0.14$ ); **(b)** P ( $p < 0.05$ ;  $r = -0.20$ ), and **(c)** K ( $p < 0.05$ ;  $r = 0.42$ ).

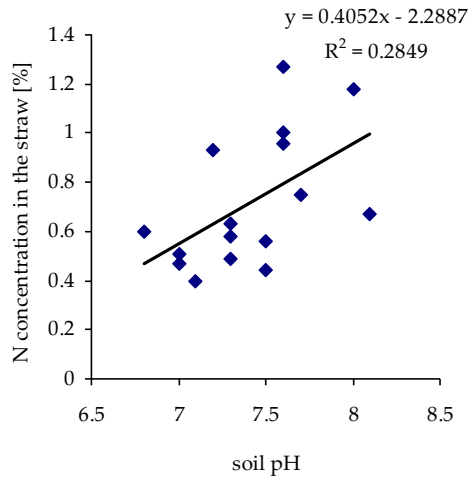

(a)

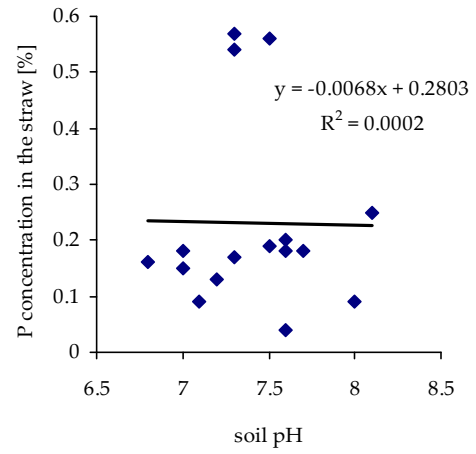

(b)

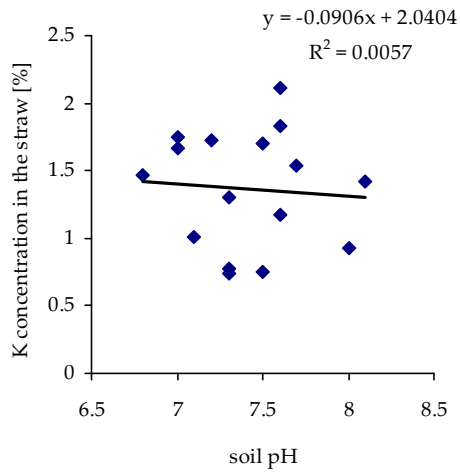

(c)

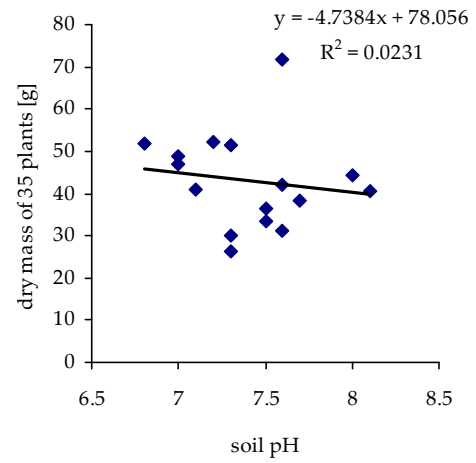

(d)

**Figure S11.** Relationship between the soil pH and the concentration of N, P, K in the straw [% dry matter] and dry mass of 35 plants: **(a)** N ( $p < 0.05$ ;  $r = 0.53$ ); **(b)** P ( $p < 0.05$ ;  $r = -0.01$ ), **(c)** K ( $p < 0.05$ ;  $r = -0.08$ ), and **(d)** mass of 35 plants ( $p < 0.05$ ;  $r = -0.15$ ).

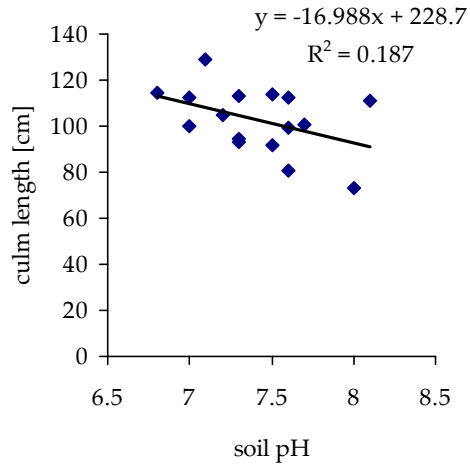

(a)

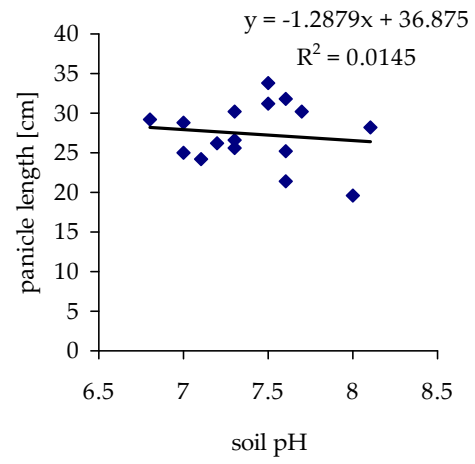

(b)

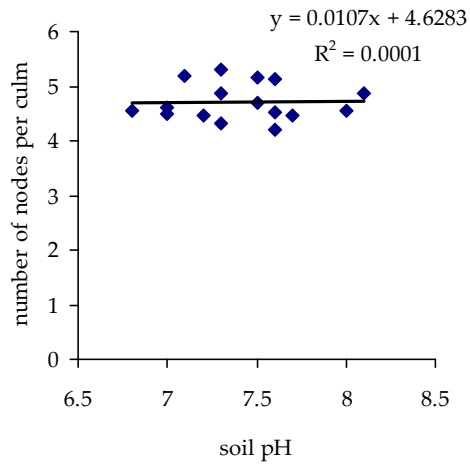

(c)

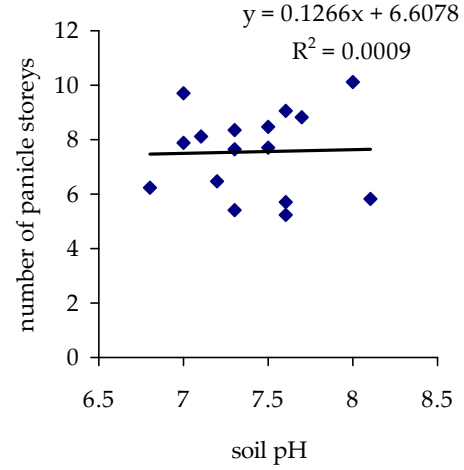

(d)

**Figure S12.** Relationship between the soil pH and selected morphological features of *A. spica-venti*: **(a)** culm length ( $p < 0.05$ ;  $r = -0.43$ ), **(b)** panicle length ( $p < 0.05$ ;  $r = -0.12$ ), **(c)** number of nodes per culm ( $p < 0.05$ ;  $r = 0.01$ ), and **(d)** number of panicle storeys ( $p < 0.05$ ;  $r = 0.03$ ).
